# Supplementary material for: A graphite/amorphous diamond coupled framework with high ORR and OER performance applied as a cathode catalyst in zinc–air batteries
Source: Royal Society of Chemistry journal article supplement (doi:10.1039/d4se00263f), 2024-01-01
Supplement: d4se00263f1.pdf [file d4se00263f1.pdf]

## Supporting Information

# **Graphite/ amorphous diamond coupled frames with high ORR and OER performance apply to zinc-air batteries cathode catalyst**

## **S1 Chemical reagent**

Boracic acid ( $\geq 95\%$ )、Chitosan ( deacetylation degree  $\geq 95\%$ ), Glacial acetic acid from Aladdin (100%) and Pluronic F-127 ( $\geq 99.5\%$ ) from Shanghai yuanye Bio-Technology Co, Ltd .

## **S2 Materials Characterizations**

The crystal structure information of as-prepared catalysts was obtained from X-ray diffraction (XRD, DX-2700) using Cu K $\alpha$  radiation with a scan speed of  $4^\circ \text{ min}^{-1}$ . The specific XRD parameters are as follows

|         |                    |
|---------|--------------------|
| target  | = Cu (0.154056 nm) |
| voltage | = 40.0 (kV)        |
| current | = 30.0 (mA)        |

Describe the morphology structure of catalysts by field emission scanning electron microscopy (SEM, SIGMA500) and transmission electron microscopy (TEM, JEOL JEM-2100). (SEM and TEM sample preparation: First, a sample of 1mg was taken, followed by adding 1 mL of anhydrous ethanol and ultrasonic oscillation for 30 min. Use a pipette gun to measure 20  $\mu\text{L}$  of liquid, drip onto the cleaned silicon wafer, and then dry with an infrared lamp.)

The chemical state of the sample was determined by X-ray photoelectron spectroscopy (XPS, ESCALAB 250XI). (First of all, 15 mg samples were weighed and mixed into  $3\times 3\text{mm}$  tablets by a tablet press. In the sample preparation process, we used double-sided tape to glue the samples to the aluminum foil to avoid signal interference

caused by the aluminum foil tape not being covered.)

The graphitization degree of the samples was measured by Raman spectroscopy (Thermo Scientific DXR 3Xi). Raman's test wavelength is 532 nm. Sample handling: The powder sample should be flattened with a glass slide before testing to obtain a flat surface.

### S3 The potential of Hg/HgO is related to RHE

In this paper, all electrochemical tests have been normalized via conversion to a standard reversible hydrogen potential.

$$E (RHE) = E (Hg/HgO) + 0.0592pH + 0.098$$

### S4 ORR Measurements

The number of electron transfers in ORR (oxygen reduction reaction) can be calculated using the K-L equation.

$$\frac{1}{J} = \frac{1}{J_L} + \frac{1}{J_K} = \frac{1}{B\omega^{0.5}} + \frac{1}{J_K}$$
$$B = 0.2nFC_o(D_0)^{2/3}\nu^{-1/6}$$

where  $J$  is the limit current density tested,  $J_k$  is the kinetic limiting current density,  $J_L$  is the diffusion-limited current density,  $n$  is the number of electron transfers,  $F$  is Faraday's constant (96485 C mol<sup>-1</sup>),  $\omega$  is the angular velocity of the rotating disk electrode in rpm,  $C_o$  is the volume concentration of O<sub>2</sub> (1.6×10<sup>-6</sup> mol cm<sup>-3</sup>),  $D_0$  is the diffusion coefficient of O<sub>2</sub> in 0.1 mol L<sup>-1</sup> KOH (1.9×10<sup>-5</sup> cm<sup>2</sup> s<sup>-1</sup>), and  $K$  is the electron transfer rate (when the  $\omega$  unit is rpm,  $K=0.2$ ),  $\nu$  is the kinematic viscosity (0.01 cm<sup>2</sup> s<sup>-1</sup>).

<sup>1</sup>).

The yield of H<sub>2</sub>O<sub>2</sub> in the ORR reaction using the rotating disk electrode (RRDE) technique can be calculated as follows:

$$\%H_2O_2 = 200 \frac{I_R/N}{I_D + I_R/N}$$

The electron transfer number (n) is calculated as follows:

$$n = 4 \frac{I_D}{I_R/N + I_D}$$

Where  $I_R$  indicates the ring current and  $I_D$  indicates the disk current. N is 0.37.

### **S5 Calculation of Effective Active Surface Area (ECSA)**

The electrochemically active surface area (ECSA) of the electrochemical double-layer capacitor (C<sub>DL</sub>) can be evaluated using the cyclic voltammetry (CV) method. The double-layer capacitance can be obtained by scanning at 10, 20, 30, 30, 40, and 50 mV s<sup>-1</sup>.

$$C_{DL} = \frac{i_m}{v} = (i_a - i_c)/2v$$

$$ECSA = C_{DL}/C_s$$

Where  $C_{DL}$  is the double layer capacitor (mF), the average current of the  $i_m$  working electrode,  $i_c$ , and  $i_a$  represents the cathode and anode current (mA) respectively,  $v$  represents the scanning rate (V s<sup>-1</sup>)  $C_s$  is the specific capacitance of the catalyst (mF cm<sup>-2</sup>). It is generally considered to be 0.035 mF cm<sup>-2</sup> in 0.1 M KOH electrolyte.

## S6 OER Measurements

The OER test is performed in a 0.1M KOH solution, and nitrogen is injected to remove oxygen from the solution.

The catalytic performance of the biofunctional catalyst ( $\Delta E = E_{j=10} - E_{1/2}$ ) is determined by the difference between the potential corresponding to the oxygen evolution reaction with  $10 \text{ mA cm}^{-2}$  ( $E_{j=10}$ ) for OER and the half-wave potential of the oxygen reduction reaction ( $E_{1/2}$ ).

## S7 Zn–air Batteries

The zinc-air batteries described in this paper were tested in a 6 M KOH solution. In these batteries, the polished zinc sheet acted as the negative electrode, while the carbon cloth coated with the catalyst acted as the positive electrode. The cycle test was performed at  $5 \text{ mA cm}^{-2}$ , with a charging time of 5 minutes and a discharging time of 5 minutes for each cycle.

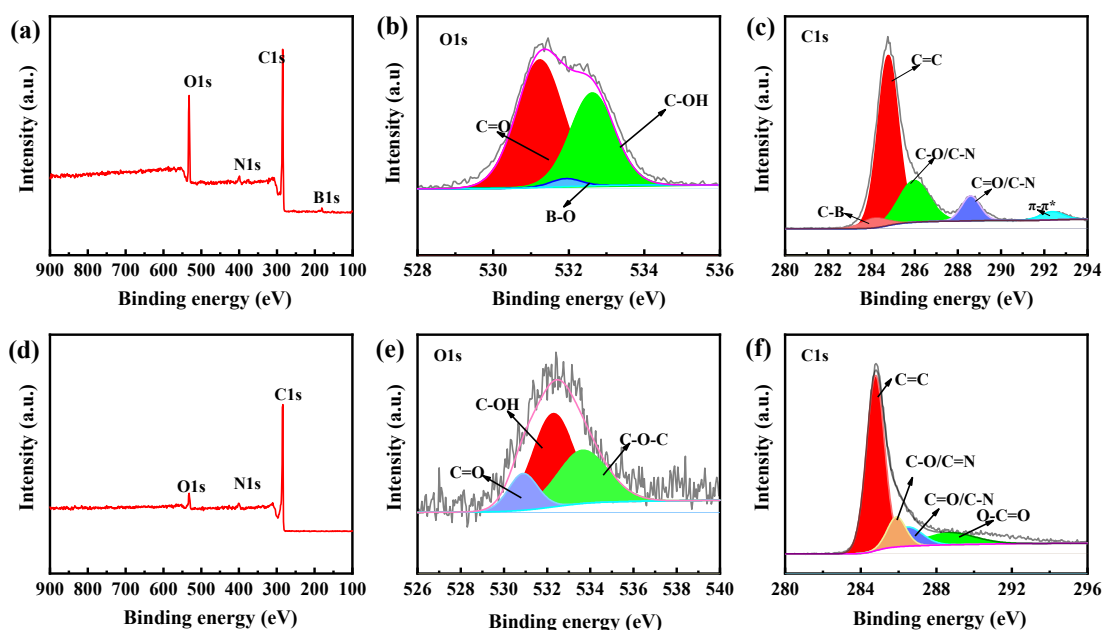

Figure S1 XPS of CSF127B<sub>1</sub>.(a) Total spectrum. (b)O1s. (c) C1s.

XPS of CSF127. (d) Total spectrum. (e)O1s. (f) C1s.

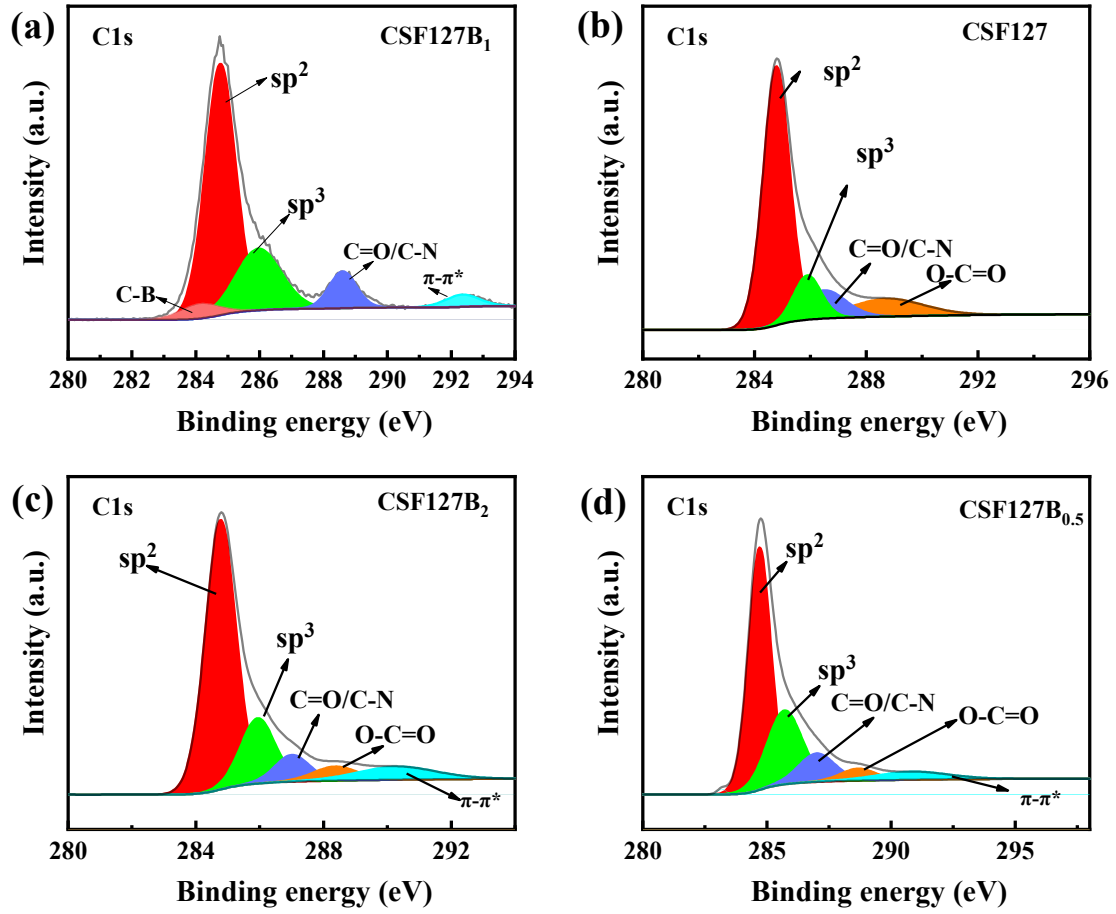

Figure S2 Deconvolution of the C 1s core level spectra for samples (a)CSF127B<sub>1</sub>;(b)CSF127;(c)CSF127B<sub>2</sub>;(d)CSF127B<sub>0.5</sub>

Table S1 Different sample element content

|                        | B<br>(at%) | C(at%) | N(at%) | O(at%%) |
|------------------------|------------|--------|--------|---------|
| CSF127B <sub>1</sub>   | 2.06       | 84.23  | 2.27   | 11.44   |
| CSF127                 | 0          | 90.21  | 4.02   | 5.77    |
| CSF127B <sub>0.5</sub> | 1.32       | 87.76  | 4.51   | 6.41    |
| CSF127B <sub>2</sub>   | 1.2        | 87.3   | 5.33   | 6.17    |

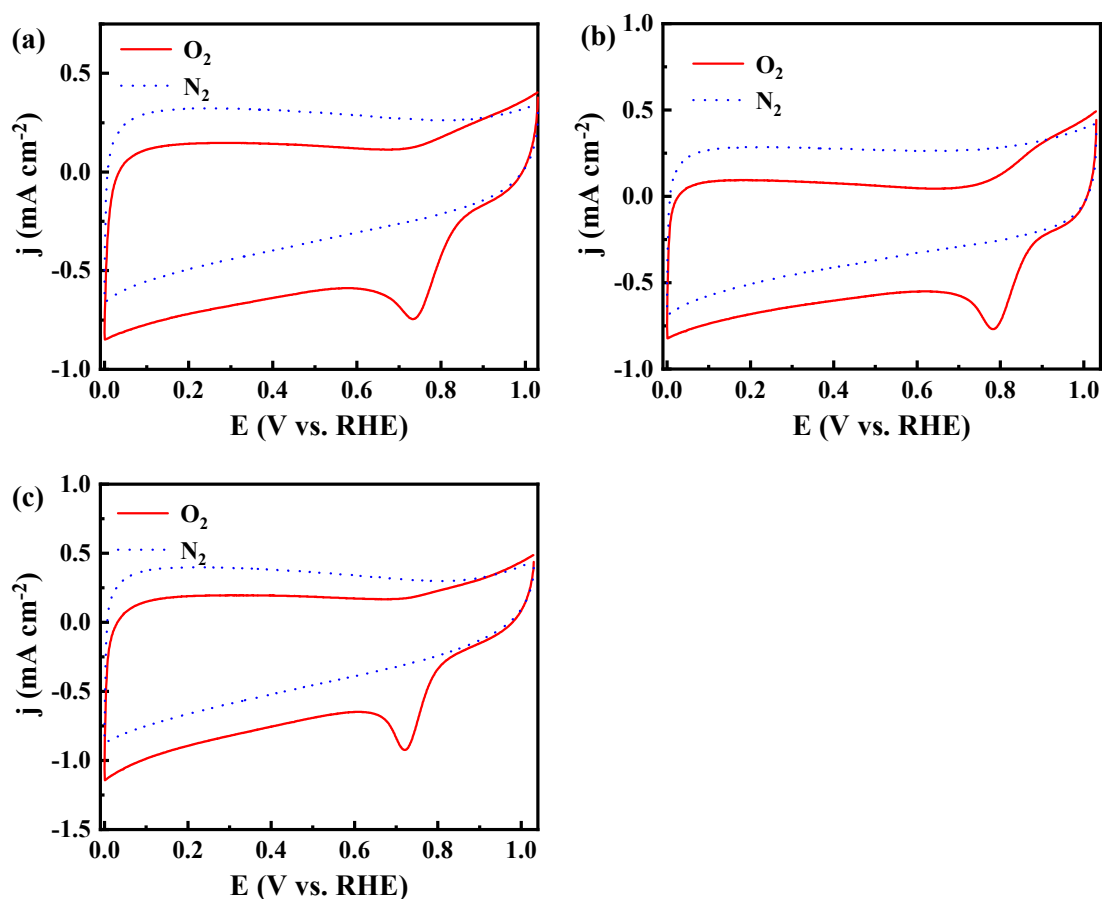

Figure S3 (a) CVs of CSF127B<sub>0.5</sub>. (b) CVs of CSF127. (c) CVs of CSF127B<sub>2</sub> in O<sub>2</sub> and N<sub>2</sub>-saturated 0.1 M KOH solution.

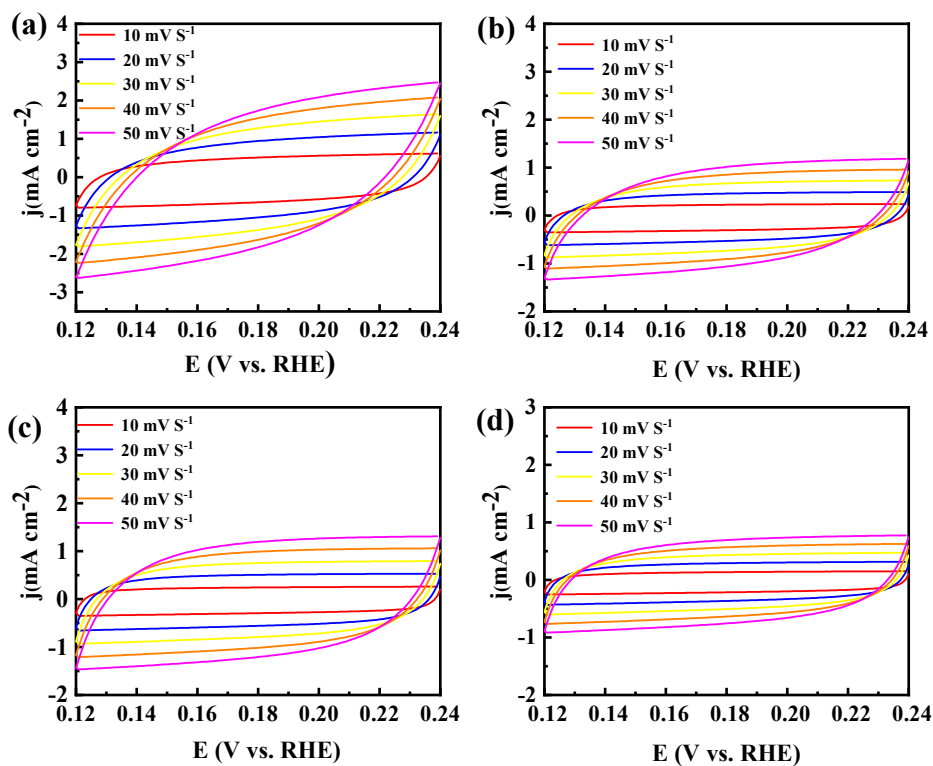

Figure S4 10-50 mV s<sup>-1</sup> CV curves at different sweep speeds (a) CSF127B<sub>1</sub>.

(b)CSF127.(c)CSF127B<sub>2</sub>.(d)CSF127B<sub>0.5</sub>.

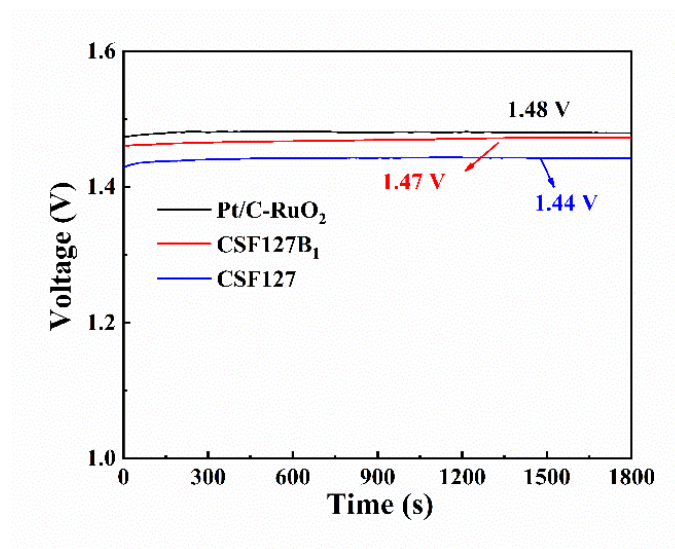

Figure S5 Open circuit voltage of CSF127B<sub>1</sub>, CSF127 and Pt/C-RuO<sub>2</sub> in Zinc-air battery.

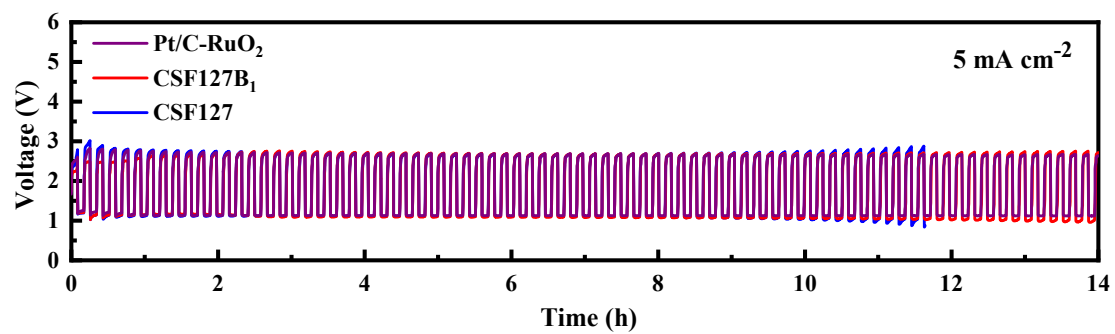

Figure S6 Zooming of zinc-air battery cycle

Table S2 Comparison of ORR and OER properties of different catalysts

| Catalyst                                               | onset<br>potential<br>(V) | ORR<br>Performance<br>$E_{1/2}$ (V) | Limiting<br>current<br>Density<br>(mA cm <sup>-2</sup> ) | OER<br>Performance<br>$E_{j=10}$ | $\Delta E$<br>( $E_{j=10}-E_{1/2}$ )<br>(V) | Ref          |
|--------------------------------------------------------|---------------------------|-------------------------------------|----------------------------------------------------------|----------------------------------|---------------------------------------------|--------------|
| CSF127B <sub>1</sub>                                   | 0.924                     | 0.821                               | 5.26                                                     | 1.515                            | 0.694                                       | This<br>work |
| NBCNT-10                                               | 0.958                     | 0.82                                | 5.52                                                     | —                                | —                                           | 1            |
| BN-C-1                                                 | 0.876                     | 0.812                               | 5.88                                                     | —                                | —                                           | 2            |
| BN/C                                                   | —                         | 0.8                                 | 5                                                        | —                                | —                                           | 3            |
| N <sub>0.54</sub> -Z <sub>3</sub> /M <sub>1</sub> -900 | 0.94                      | 0.824                               | —                                                        | —                                | —                                           | 4            |
| NPSCS                                                  | 0.965                     | 0.834                               | 6.04                                                     | 1.662                            | 0.828                                       | 5            |
| CNT@NSCF                                               | 0.94                      | 0.82                                | —                                                        | 1.56                             | 0.74                                        | 6            |
| NBF-CNW                                                | 0.95                      | 0.818                               | 6                                                        | —                                | —                                           | 7            |
| B,N-Carbon                                             | 0.98                      | 0.84                                | 6                                                        | 1.57                             | 0.73                                        | 8            |
| NPBC                                                   | 0.98                      | 0.86                                | —                                                        | 1.68                             | 0.82                                        | 9            |
| NB-CN                                                  | 0.92                      | 0.84                                | —                                                        | 1.65                             | 0.81                                        | 10           |
| SHG                                                    | 1.01                      | 0.87                                | 5.01                                                     | 1.56                             | 0.77                                        | 11           |

## References

1. P. Wei, X. Li, Z. He, X. Sun, Q. Liang, Z. Wang, C. Fang, Q. Li, H. Yang, J. Han and Y. Huang, *Chemical Engineering Journal*, 2021, **422**.
2. M. Fan, Q. Yuan, Y. Zhao, Z. Wang, A. Wang, Y. Liu, K. Sun, J. Wu, L. Wang and J. Jiang, *Advanced Materials*, 2022, **34**.
3. R. Zhao, Q. Li, Z. Chen, V. Jose, X. Jiang, G. Fu, J.-M. Lee and S. Huang, *Carbon*, 2020, **164**, 398-406.
4. X. Li, B. Y. Guan, S. Gao and X. W. Lou, *Energy & Environmental Science*, 2019, **12**, 648-655.
5. X. Tao, Q. Zhang, Y. Li, X. Lv, D. Ma and H.-g. Wang, *Applied Surface Science*, 2019, **490**, 47-55.
6. X. Wang, G.-L. Li, Z.-F. Lu, S. Cao, C. Hao, S. Wang and G. Sun, *Catalysis Science & Technology*, 2022, **12**, 181-191.
7. Z. Lu, Z. Li, S. Huang, J. Wang, R. Qi, H. Zhao, Q. Wang and Y. Zhao, *Applied Surface Science*, 2020, **507**.
8. T. Sun, J. Wang, C. Qiu, X. Ling, B. Tian, W. Chen and C. Su, *Advanced Science*, 2018, **5**.
9. b. Qiaodi Wanga, Yiming Lic, Kai Wanga, Juntao Zhoua, Lianwen Zhuc, Li Gua, Jing Hub, Xuebo Cao, *Electrochimica Acta*, 2017, **257**, 250-258.
10. Z. Lu, J. Wang, S. Huang, Y. Hou, Y. Li, Y. Zhao, S. Mu, J. Zhang and Y. Zhao, *Nano Energy*, 2017, **42**, 334-340.
11. C. Hu and L. Dai, *Advanced Materials*, 2016, **29**.
